## **Ca<sup>2+</sup> TRANSPORT IN *SACCHAROMYCES CEREVISIAE***

KYLE W. CUNNINGHAM<sup>1,2</sup> AND GERALD R. FINK<sup>1</sup>

<sup>1</sup>*Whitehead Institute for Biomedical Research, Massachusetts Institute of Technology, 9 Cambridge Center, Cambridge, MA 02142, USA* and <sup>2</sup>*Department of Biology, The Johns Hopkins University, 3400 N. Charles Street, Baltimore, MD 21218, USA*

### **Summary**

Cytosolic free Ca<sup>2+</sup> is maintained at submicromolar levels in budding yeast by the activity of Ca<sup>2+</sup> pumps and antiporters. We have recently identified the structural genes for two Ca<sup>2+</sup> pumps, *PCMI* and *PMRI*, which are required for Ca<sup>2+</sup> sequestration into the vacuole and secretory organelles, respectively. The function of either Ca<sup>2+</sup> pump is sufficient for yeast viability, but deletion of both genes is lethal because of elevation of cytosolic [Ca<sup>2+</sup>] and activation of calcineurin, a Ca<sup>2+</sup>- and calmodulin-dependent protein phosphatase. Calcineurin activation decreases Ca<sup>2+</sup> sequestration in the vacuole by a putative Ca<sup>2+</sup> antiporter and may also increase Ca<sup>2+</sup> pump activity. These regulatory processes can affect the ability of yeast strains to tolerate high extracellular [Ca<sup>2+</sup>]. We propose a model in which the cellular response to changes in the environmental levels of Ca<sup>2+</sup> is mediated by calmodulin and calcineurin which, in turn, modulate the various types of Ca<sup>2+</sup> transporters.

### **Introduction**

The budding yeast *Saccharomyces cerevisiae*, like other eukaryotes, actively maintains cytosolic free Ca<sup>2+</sup> concentrations [Ca<sup>2+</sup>]<sub>i</sub> at extremely low levels in spite of very steep gradients of this ion across the plasma membrane and across intracellular membranes. It is generally believed that this asymmetric distribution avoids aggregation of Ca<sup>2+</sup> with phosphate-containing molecules in the cytosol while still providing various organelles with sufficient Ca<sup>2+</sup> for their proper function. Superimposed on the need for low [Ca<sup>2+</sup>]<sub>i</sub> is the requirement for Ca<sup>2+</sup> as a second messenger in signal transduction. Transient increases in [Ca<sup>2+</sup>]<sub>i</sub> regulate a wide variety of cellular processes in other species and there is now good evidence that Ca<sup>2+</sup> signaling is important in yeast as well. Furthermore, yeast expresses the same repertoire of signaling molecules as that used in animal cells (calmodulin and calmodulin-dependent protein kinases and phosphatases). Because of this similarity, the origin of Ca<sup>2+</sup> signals and the individual roles of these effector molecules in yeast has become a burgeoning field (for a review, see Davis, 1994).

At the heart of this complex and highly regulated process are a battery of Ca<sup>2+</sup> channels, antiporters and pumps, which are primarily responsible for maintaining and

**Key words:** calcium signaling, calmodulin, Ca<sup>2+</sup> pumps, Ca<sup>2+</sup> antiporters, vacuole, *Saccharomyces cerevisiae*.

altering the  $\text{Ca}^{2+}$  levels in the various compartments. Progress in understanding the individual roles of these transporters has increased dramatically with the recent cloning and molecular characterization of several key components. The ability to manipulate genetically all of the individual  $\text{Ca}^{2+}$  transporters in conjunction with the downstream  $\text{Ca}^{2+}$  signaling factors in yeast provides a powerful new perspective on the ubiquitous problem of cellular  $\text{Ca}^{2+}$  homeostasis and signaling. This article summarizes many of the recent advances in our understanding of  $\text{Ca}^{2+}$  transporters and  $\text{Ca}^{2+}$  flow in yeast.

### **$\text{Ca}^{2+}$ channels**

In eukaryotic cells,  $\text{Ca}^{2+}$  signals are usually initiated by the triggered opening of  $\text{Ca}^{2+}$  channels in the plasma membrane and certain organellar membranes, which allows a rapid influx of  $\text{Ca}^{2+}$  into the cytosol down its concentration gradient. The massive influx of  $\text{Ca}^{2+}$ , which typically increases  $[\text{Ca}^{2+}]_i$  10- to 100-fold over the basal level of approximately  $0.1 \mu\text{mol l}^{-1}$ , is soon followed by channel closure and active removal of  $\text{Ca}^{2+}$  from the cytosol by the  $\text{Ca}^{2+}$  antiporters and pumps. Transient spikes and oscillations in  $[\text{Ca}^{2+}]_i$  generated by this coordinated process are known to regulate a wide variety of processes in non-excitabile cells; for example, exocytosis, gene expression and cell-cycle progression. In yeast,  $\text{Ca}^{2+}$  signals may regulate similar processes (for reviews, see Anraku *et al.* 1991; Davis, 1994; Youatt, 1993). Progress in understanding  $\text{Ca}^{2+}$  signaling has been slow because of limitations in the direct measurement of  $[\text{Ca}^{2+}]_i$  and difficulties in quantifying  $\text{Ca}^{2+}$  channel activity in yeast.

Though  $\text{Ca}^{2+}$  channels have not been isolated or cloned from yeast, there is good evidence that these transporters exist. The patch-clamp technique has revealed a stretch-activated or mechanosensitive ion channel in the plasma membrane that passes many ions including  $\text{Ca}^{2+}$  (Gustin *et al.* 1988). Additionally, increased rates of  $\text{Ca}^{2+}$  influx into living yeast cells have been observed during the G1/S transition in the cell division cycle, during cell cycle arrest in late G1 caused by either mating pheromones (Ohsumi and Anraku, 1985) or certain temperature-sensitive mutations (Anand and Prasad, 1987; Prasad and Rosoff, 1992), and during the response to nutrient feeding (Eilam and Othman, 1990; Eilam *et al.* 1990; Nakajima *et al.* 1991). Another possible  $\text{Ca}^{2+}$  channel has been detected in purified membrane vesicles derived from the yeast vacuole (Belde *et al.* 1993). These vesicles accumulate  $\text{Ca}^{2+}$  *in vitro* and release a small portion in response to added inositol-1,4,5-trisphosphate ( $\text{InsP}_3$ ), suggesting a similarity to the  $\text{InsP}_3$  receptor in the endoplasmic reticulum of animal cells. At present, it is unclear when and how the channel activities are triggered and what processes might be affected by their opening.

### **Vacuolar $\text{H}^+/\text{Ca}^{2+}$ antiport**

Biochemical experiments indicate that the yeast vacuolar membrane actively transports  $\text{Ca}^{2+}$  *via*  $\text{H}^+/\text{Ca}^{2+}$  antiport (Dunn *et al.* 1994; Ohsumi and Anraku, 1983; Okorokov *et al.* 1985).  $\text{Ca}^{2+}$  uptake activity into purified vacuoles and vacuole membrane vesicles is completely dependent on the transmembrane pH gradient  $\Delta\text{pH}$  (interior acid) that is normally produced by the vacuolar  $\text{H}^+$  V-ATPase, though some uptake still occurs in the

absence of ATP if the  $\Delta\text{pH}$  is generated by chemical ion diffusion gradients (Dunn *et al.* 1994). A potential difference  $\Delta\Psi$  (interior positive) did not promote Ca<sup>2+</sup> uptake. Uptake into isolated vacuoles is saturable by cytosolic Ca<sup>2+</sup> and displays an apparent  $K_m$  for Ca<sup>2+</sup> at 25–50  $\mu\text{mol l}^{-1}$ , which is much higher than the  $[\text{Ca}^{2+}]_i$  observed in living cells (approximately 0.15  $\mu\text{mol l}^{-1}$ ). The antiporter has not been isolated, its structural gene has not been cloned and no mutants are available to address its specific functions and roles in yeast. Recently though, we have isolated a yeast gene whose predicted product is homologous to the retinal Na<sup>+</sup>/Ca<sup>2+</sup>,K<sup>+</sup> and cardiac Na<sup>+</sup>/Ca<sup>2+</sup> exchangers from mammals and appears to be required for optimal Ca<sup>2+</sup> sequestration into the vacuole *in vivo* (K. W. Cunningham and G. R. Fink, in preparation). Therefore, it is possible that the cloned gene encodes the previously characterized low-affinity H<sup>+</sup>/Ca<sup>2+</sup> antiporter or possibly some other type of Ca<sup>2+</sup> transporter.

### Pmc1p: a vacuolar Ca<sup>2+</sup> pump

The yeast vacuole membrane also contains a putative high-affinity Ca<sup>2+</sup> pump, Pmc1p, which is the product of the *PMCI* gene (Cunningham and Fink, 1994). Pmc1p is approximately 40% identical to plasma membrane Ca<sup>2+</sup>-ATPases (PMCA) and is much less similar to other P-type ion pumps (Fig. 1). Pmc1p apparently lacks the calmodulin-binding domain at the C terminus, but otherwise appears to be a functional ion pump localized predominantly to the vacuole membrane. By analogy to the animal enzyme,

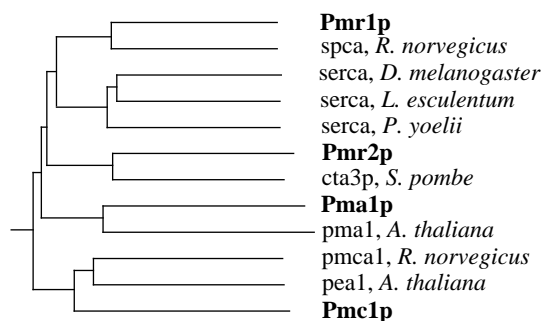

Fig. 1. Phylogenetic tree of selected P-type ATPases from *Saccharomyces cerevisiae* and other species. The weighted tree was drawn by Megalign (DNASTAR, Inc.) using the Clustal method for multiple alignment using Drs2p (Ripmaster *et al.* 1993) as an outgroup (not shown). The protein sequences Pmr1p, Pmr2p, Pma1p and Pmc1p were obtained from translation of *Saccharomyces cerevisiae* genomic DNA (Cunningham and Fink, 1994; Rudolph *et al.* 1989; Serrano *et al.* 1986). Animal sequences for the secretory pathway Ca<sup>2+</sup>-ATPase (spca1), sarcoplasmic/endoplasmic reticulum Ca<sup>2+</sup>-ATPase (serca2b) and plasma membrane Ca<sup>2+</sup>-ATPase (pmca1a) were obtained from the rat *Rattus norvegicus* (Günteski-Hamblin *et al.* 1992; Shull and Greeb, 1988) and fruit fly *Drosophila melanogaster* (Magyar and Varadi, 1990). Higher plant sequences were from *Arabidopsis thaliana* (Huang *et al.* 1993; Pardo and Serrano, 1989) and the tomato *Lycopersicon esculentum* (Wimmers *et al.* 1992). Sequences from the fission yeast *Schizosaccharomyces pombe* (Ghislain *et al.* 1990) and the protozoan *Plasmodium yoelii* (Murakami *et al.* 1990) have also been included.

Pmc1p is expected to catalyze the high-affinity ( $K_m$  approximately  $1 \mu\text{mol l}^{-1}$ ) and ATP-dependent transport of  $\text{Ca}^{2+}$  into the vacuole. Such an activity was not observed in previous experiments using isolated vacuole membrane vesicles (Dunn *et al.* 1994; Ohsumi and Anraku, 1983). It is possible that the  $\text{Ca}^{2+}$  transport activity of Pmc1p was obscured by the much greater  $\text{H}^+/\text{Ca}^{2+}$  antiport activity in these experiments. Alternatively, Pmc1p may have unexpected properties, such as instability, low  $\text{Ca}^{2+}$  affinity, sensitivity to protonophores, or other characteristics that prevented its earlier detection. In support of its function as a  $\text{Ca}^{2+}$  transporter in living yeast cells, mutants lacking Pmc1p accumulate  $\text{Ca}^{2+}$  in the vacuole at less than 20% of the wild-type rate during growth in standard medium (Cunningham and Fink, 1994). The *pmc1* null mutants also display a severe sensitivity to  $\text{Ca}^{2+}$  supplements in the growth medium. Although it is likely that Pmc1p transports  $\text{Ca}^{2+}$  into the vacuole, further biochemical experiments are necessary to demonstrate its activities. The biochemical properties of Pmc1p should be resolved through studies of isolated Pmc1p or of vacuole membrane vesicles prepared from mutants specifically lacking the  $\text{H}^+/\text{Ca}^{2+}$  antiport activity.

#### **Pmr1p: a secretory $\text{Ca}^{2+}$ pump**

Another putative  $\text{Ca}^{2+}$  pump localizes to the Golgi complex or related secretory compartments and is encoded by the *PMR1* gene (Antebi and Fink, 1992; Rudolph *et al.* 1989). Pmr1p is approximately 50% identical to a P-type ion pump of unknown function that is expressed in many animal tissues (Günteski-Hamblin *et al.* 1992), approximately 30% identical to members of the SERCA sub-family, which are  $\text{Ca}^{2+}$ -ATPases found in the sarcoplasmic/endoplasmic reticulum of animal cells, and less than 25% identical to other ion pumps (Fig. 1). The biochemical activities of Pmr1p have not been investigated, but several lines of genetic evidence suggest that it functions as a primary  $\text{Ca}^{2+}$  transporter supplying  $\text{Ca}^{2+}$  to compartments in the secretory pathway (Antebi and Fink, 1992; Rudolph *et al.* 1989). Mutants lacking Pmr1p function secrete abnormal proteins that have not been proteolytically cleaved by a  $\text{Ca}^{2+}$ -dependent protease located in a late Golgi compartment, though this defect and others can be remedied by supplementing the growth medium with  $\text{Ca}^{2+}$  concentrations greater than  $10 \text{mmol l}^{-1}$ . Decreasing extracellular  $\text{Ca}^{2+}$  to below  $1 \mu\text{mol l}^{-1}$  causes a severe growth defect in *pmr1* null mutants (Antebi and Fink, 1992; Rudolph *et al.* 1989). These and other results (see below) strongly suggest that Pmr1p functions as a primary  $\text{Ca}^{2+}$  transporter that supplies the Golgi with the  $\text{Ca}^{2+}$  required for specific secretory functions.

#### **$\text{Ca}^{2+}$ transport in the endoplasmic reticulum**

$\text{Ca}^{2+}$  is generally thought to play important roles in protein traffic in the endoplasmic reticulum (ER) and related secretory compartments (Sambrook, 1990). To date, there is no evidence in yeast for the existence of authentic SERCA-type  $\text{Ca}^{2+}$  pumps. With the possible exception of Pmr1p, the known P-type ATPases in yeast are not homologous to the SERCA family members from plants and animals and have functions unrelated to  $\text{Ca}^{2+}$  transport. The *PMA1* gene encodes the major P-type  $\text{H}^+$ -ATPase of the plasma

membrane (Serrano *et al.* 1986) and *PMA2* encodes a transporter of unknown function that is 90% identical to the *PMA1* gene product (Schlesser *et al.* 1988). *Pmr2p*, which is encoded by at least four tandemly repeated genes, is likely to be a plasma membrane ion pump involved in  $\text{Na}^+$  and  $\text{Li}^+$  efflux but not in  $\text{Ca}^{2+}$  transport (Garcia-deblas *et al.* 1993; Haro *et al.* 1991; Rudolph *et al.* 1989). The predicted products of *PMR2* genes are more than 97% identical to each other and have high degree of similarity to the *CTA3* gene product of the fission yeast *Schizosaccharomyces pombe* (Fig. 1) that has been implicated in  $\text{Ca}^{2+}$  metabolism (Ghislain *et al.* 1990; Halachmi *et al.* 1992). Finally, the *DRS2* gene is expected to encode a highly divergent P-type ion pump of unknown catalytic function (Ripmaster *et al.* 1993). Whether any of these proteins (*Pma1p*, *Pma2p*, *Pmr2p* or *Drs2p*) is involved in  $\text{Ca}^{2+}$  transport into the ER or other membrane compartments is not known, but unidentified  $\text{Ca}^{2+}$  transporters have been measured in some membrane preparations (Hiraga *et al.* 1991; Okorokov *et al.* 1993).

### **Ca<sup>2+</sup>-sensitive mutants**

A genetic approach towards identifying important factors in  $\text{Ca}^{2+}$  metabolism has been to isolate yeast mutants with altered responses to  $\text{Ca}^{2+}$  in the growth medium (Ohya *et al.* 1984, 1986). Wild-type yeast strains can grow in media containing more than  $100 \text{ mmol l}^{-1} \text{ Ca}^{2+}$ , but recessive mutations in at least 18 genes abolish growth under these conditions (Ohya *et al.* 1986). Many of these genes appear to be necessary for maintaining the proper structure or function of the vacuole. Mutations that inactivate subunits of the vacuolar  $\text{H}^+$  V-ATPase or other factors necessary for acidification of the vacuole lumen cause extreme sensitivity to added  $\text{CaCl}_2$  and cause about a sixfold elevation in  $[\text{Ca}^{2+}]_i$  in standard media as measured in single cells using the fluorescent indicator Fura-2 (Ohya *et al.* 1991). Deactivation of the vacuolar  $\text{H}^+/\text{Ca}^{2+}$  antiporter has been proposed to explain these effects, but other indirect mechanisms are also possible.

A second search for mutants specifically sensitive to  $\text{Ca}^{2+}$  revealed the *CSG2* gene (Beeler *et al.* 1994). In response to elevated external  $[\text{Ca}^{2+}]$ , *csg2* mutants accumulate  $\text{Ca}^{2+}$  into an exchangeable pool rather than into the non-exchangeable (vacuolar) pool. Therefore, *Csg2p* may normally function to promote  $\text{Ca}^{2+}$  efflux from this unidentified compartment, to inhibit *Pmr1p* or another non-vacuolar  $\text{Ca}^{2+}$  transporter, or to influence cellular  $\text{Ca}^{2+}$  flow by a more indirect mechanism (Beeler *et al.* 1994). *CSG2* is identical to *CLS2* identified in the screen for  $\text{Ca}^{2+}$ -sensitive mutants described above (Y. Takita, Y. Ohya and Y. Anraku, in preparation). The predicted product of *CSG2/CLS2* has no significant similarity to other protein sequences, but contains multiple membrane-spanning domains and is localized to the ER (Y. Takita, Y. Ohya and Y. Anraku, in preparation). Further biochemical and genetic analyses may clarify the function of this interesting protein and define the roles of the other *CLS* genes in  $\text{Ca}^{2+}$  tolerance.

### **Ca<sup>2+</sup> flow and dynamics**

A working model of  $\text{Ca}^{2+}$  metabolism that takes into account the new findings is depicted in Fig. 2. Yeast cells growing in standard media (approximately  $0.2 \text{ mmol l}^{-1}$

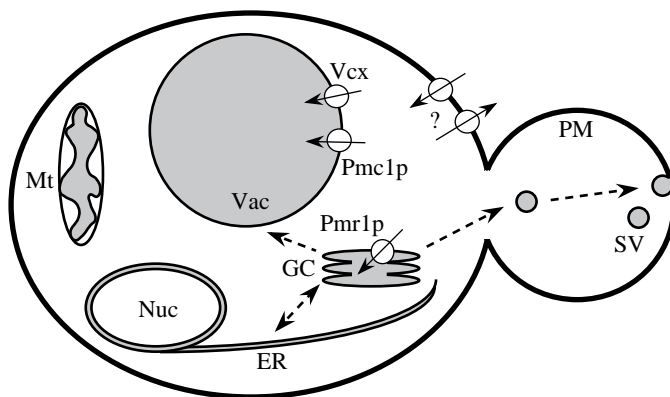

Fig. 2. Working model for  $\text{Ca}^{2+}$  flow in growing yeast cells. Solid arrows indicate  $\text{Ca}^{2+}$  movement through membranes catalyzed by putative channels (?), pumps (Pmc1p and Pmr1p) and the vacuolar  $\text{H}^+/\text{Ca}^{2+}$  antiporter (Vcx). Dashed arrows represent vesicle-mediated trafficking of proteins and presumed paths of  $\text{Ca}^{2+}$  flow. Vac, vacuole; Mt, mitochondria; Nuc, nucleus; ER, endoplasmic reticulum; GC, Golgi complex; SV, secretory vesicles; PM, plasma membrane.

$\text{Ca}^{2+}$ ) would take up  $\text{Ca}^{2+}$  from the medium *via* the opening of unidentified  $\text{Ca}^{2+}$  channels in the plasma membrane or through other unspecified mechanisms. The steady-state  $[\text{Ca}^{2+}]_i$  of about  $0.1 \mu\text{mol l}^{-1}$  is maintained through the combined action of Pmr1p in the Golgi complex, Pmc1p in the vacuole, the  $\text{H}^+/\text{Ca}^{2+}$  antiporter in the vacuole and possibly unidentified transporters in other organelles such as the plasma membrane. It also seems likely that vesicle-mediated transport processes ultimately contribute to the sequestration of  $\text{Ca}^{2+}$  in the vacuole and export of  $\text{Ca}^{2+}$  from the cell concomitant with protein targeting. Since Pmr1p and other  $\text{Ca}^{2+}$  transporters are presumably synthesized in the ER and then sorted to their final destinations, their operation within secretory compartments might significantly affect the overall flow of  $\text{Ca}^{2+}$  in the cell (Fig. 2). Yeast mitochondria accumulate little  $\text{Ca}^{2+}$  and their role in  $\text{Ca}^{2+}$  metabolism is poorly understood (Carafoli *et al.* 1970; Uribe *et al.* 1992).

Pulse-chase experiments using  $^{45}\text{Ca}^{2+}$  have revealed two major intracellular 'pools' that accumulate  $\text{Ca}^{2+}$ . The smaller pool is highly exchangeable with external  $\text{Ca}^{2+}$  with a half-time of approximately 2 min (Cunningham and Fink, 1994; Eilam, 1982*a,b*) and probably reflects the portion of  $\text{Ca}^{2+}$  in the cytosol or in secretory organelles that can be exported from the cell. More than 90% of the total cell-associated  $\text{Ca}^{2+}$  accumulates in a non-exchangeable pool in growing cells and this pool is largely confined to the vacuole (Eilam *et al.* 1985; Ohsumi *et al.* 1988). Estimates of vacuolar  $\text{Ca}^{2+}$  content range from 1 to  $4 \text{ mmol l}^{-1}$  in wild-type cells grown in standard media, but it is likely that intravacuolar free  $\text{Ca}^{2+}$  concentrations  $[\text{Ca}^{2+}]_v$  are effectively much lower due to buffering by soluble inorganic polyphosphates (Dunn *et al.* 1994).  $\text{Ca}^{2+}$  can be completely released from isolated vacuoles or from whole cells using the ionophores A23187 or ionomycin, suggesting that the non-exchangeable pool of  $\text{Ca}^{2+}$  is soluble. As expected for vacuolar  $\text{Ca}^{2+}$  transporters, accumulation of  $\text{Ca}^{2+}$  into the non-exchangeable pool is decreased fivefold in *pmc1* null mutants relative to *PMC1* strains (Cunningham and Fink, 1994).

Conversely, the non-exchangeable pool is significantly increased in *pmr1* null mutants, presumably as a consequence of decreased  $\text{Ca}^{2+}$  accumulation in the secretory pathway and export (K. W. Cunningham and G. R. Fink, in preparation). Together, these findings suggest that the vacuole is a major  $\text{Ca}^{2+}$  sink in yeast.

Yeast cells grow very well at a wide range of environmental  $\text{Ca}^{2+}$  concentrations from less than  $1\ \mu\text{mol l}^{-1}$  to more than  $100\ \text{mmol l}^{-1}$  and can adapt to large and rapid fluctuations in extracellular  $[\text{Ca}^{2+}]$  (Anraku *et al.* 1991). Exponentially growing cells arrest transiently in the G1 phase of the cell division cycle after addition of A23187 plus EGTA (a chelator of  $\text{Ca}^{2+}$  and other ions) to the medium (Iida *et al.* 1990a). In response to increasing extracellular  $[\text{Ca}^{2+}]$ , wild-type cells dramatically increase the non-exchangeable pool of  $\text{Ca}^{2+}$  (Beeler *et al.* 1994; Dunn *et al.* 1994), which probably reflects an increased rate of  $\text{Ca}^{2+}$  sequestration due to elevated levels of  $[\text{Ca}^{2+}]_i$  (Halachmi and Eilam, 1993). Mutants lacking *PMCI* grow poorly in media containing a high  $[\text{Ca}^{2+}]$ , although growth can be restored by overexpression of *PMR1* or the cloned antiporter gene, which implies that the rate of  $\text{Ca}^{2+}$  sequestration is growth-limiting under these conditions (Cunningham and Fink, 1994; K. W. Cunningham and G. R. Fink, in preparation). At  $\text{Ca}^{2+}$  concentrations below  $10\ \mu\text{mol l}^{-1}$ , mutants lacking *PMR1* fail to grow (Rudolph *et al.* 1989), but growth can be restored by overexpression of *PMCI*. Strains simultaneously deleted for *PMCI* and *PMR1* are inviable at all  $\text{Ca}^{2+}$  concentrations. These results are consistent with a model in which Pmc1p and Pmr1p function redundantly in  $\text{Ca}^{2+}$  sequestration, although they have distinct essential roles in response to either high or low extracellular  $[\text{Ca}^{2+}]$ , respectively. The simple model of  $\text{Ca}^{2+}$  metabolism (Fig. 2) is sufficient to accomplish the cellular goals of maintaining  $[\text{Ca}^{2+}]_i$  at tolerable levels and supplying  $\text{Ca}^{2+}$  to various internal compartments at a wide range of extracellular  $\text{Ca}^{2+}$  concentrations. Almost certainly, though, this model will be amended as new transporters are identified and as the modes of transporter regulation become understood.

### **$\text{Ca}^{2+}$ signaling**

Until recently,  $\text{Ca}^{2+}$  signals and signaling factors were thought to have only minor effects on cellular processes in yeast. Mutants expressing a defective calmodulin that is unable to bind  $\text{Ca}^{2+}$  with high affinity do not display any obvious defects in growth, mating, sporulation or various stress responses, suggesting that any signaling mediated by this factor is not required for any of these processes (Geiser *et al.* 1991). Initial reports did not identify any phenotype of mutants lacking calmodulin-dependent protein kinases (Ohya *et al.* 1991; Pausch *et al.* 1991) and identified only subtle effects of inactivating calcineurin (Cyert *et al.* 1991; Cyert and Thorner, 1992; Foor *et al.* 1992). However, clear effects of calcineurin mutations have now been observed in several new conditions. Calcineurin function appears to be necessary for growth in media containing high levels of  $\text{Na}^+$  and  $\text{Li}^+$  (Nakamura *et al.* 1993) and for the maximum induction of the *PMR2* gene in response to these conditions (Mendoza *et al.* 1994). Additionally, the  $\text{Ca}^{2+}$ - and calmodulin-dependent activation of calcineurin appears to inhibit growth of *pmc1* null mutants in high- $\text{Ca}^{2+}$  medium (Cunningham and Fink, 1994) and to induce the expression of several other genes (K. W. Cunningham and G. R. Fink, in preparation). Identification of the targets of activated calcineurin should provide not only a useful reporter for  $\text{Ca}^{2+}$

signaling events but also crucial information about the processes wherein  $\text{Ca}^{2+}$  signaling plays important roles.

Powerful methods of monitoring  $[\text{Ca}^{2+}]_i$  in living yeast cells are now available. The fluorescent indicator Indo-1 (Halachmi and Eilam, 1989; Halachmi and Eilam, 1993) and the luminescent protein aequorin (Nakajima *et al.* 1991) have been used successfully to estimate  $[\text{Ca}^{2+}]_i$  in cell suspensions, whereas Fura-2 has been employed to image  $\text{Ca}^{2+}$  in single cells (Iida *et al.* 1990b; Ohya *et al.* 1991). Despite the technical difficulties associated with these techniques, the ability to combine molecular genetics and cell physiology offers great promise for the future.

### Future prospects

Although the key participants in  $\text{Ca}^{2+}$  transport and signaling in yeast are rapidly becoming reasonable well understood, many important questions remain to be answered. Are the yeast  $\text{Ca}^{2+}$  channels similar to those of other species? When and how are natural  $\text{Ca}^{2+}$  signals produced? What are the physiological responses to these signals? Are these processes related to  $\text{Ca}^{2+}$  metabolism and signaling in plant and animal cells? The complete understanding of the catalytic and regulatory factors that act in a coordinated manner to produce  $\text{Ca}^{2+}$  signals and control  $\text{Ca}^{2+}$  metabolism will ultimately require the concerted application of many different approaches. The genetic and molecular tools available in yeast promise to add an exciting new perspective to the basic mechanisms of  $\text{Ca}^{2+}$  transport and signaling.

### References

- ANAND, S. AND PRASAD, R. (1987). Status of calcium influx in cell cycle of *S. cerevisiae*. *Biochem. Int.* **14**, 963–970.
- ANRAKU, Y., OHYA, Y. AND IIDA, H. (1991). Cell cycle control by calcium and calmodulin in *Saccharomyces cerevisiae*. *Biochim. biophys. Acta* **1093**, 169–177.
- ANTEBI, A. AND FINK, G. R. (1992). The yeast  $\text{Ca}^{2+}$ -ATPase homologue, PMR1, is required for normal Golgi function and localizes in a novel Golgi-like distribution. *Molec. Biol. Cell* **3**, 633–654.
- BEELER, T., GABLE, K., ZHAO, C. AND DUNN, T. (1994). A novel protein, Csg2p, is required for  $\text{Ca}^{2+}$  regulation in *Saccharomyces cerevisiae*. *J. biol. Chem.* **269**, 7279–7284.
- BELDE, P. J., VOSSEN, J. H., BORST-PAUWELS, G. W. AND THEUVENET, A. P. (1993). Inositol 1,4,5-trisphosphate releases  $\text{Ca}^{2+}$  from vacuolar membrane vesicles of *Saccharomyces cerevisiae*. *Febs Lett.* **323**, 113–118.
- CARAFOLI, E., BALCAVAGE, W. X., LEHNINGER, A. L. AND MATTOON, J. R. (1970).  $\text{Ca}^{2+}$  metabolism in yeast cells and mitochondria. *Biochim. biophys. Acta* **205**, 18–26.
- CUNNINGHAM, K. W. AND FINK, G. R. (1994). Calcineurin-dependent growth control in *Saccharomyces cerevisiae* mutants lacking PMC1, a homolog of plasma membrane  $\text{Ca}^{2+}$  ATPases. *J. Cell Biol.* **124**, 351–363.
- CYERT, M. S., KUNISAWA, R., KAIM, D. AND THORNER, J. (1991). Yeast has homologs (CNA1 and CNA2 gene products) of mammalian calcineurin, a calmodulin-regulated phosphoprotein phosphatase [published erratum appears in *Proc. natn. Acad. Sci. U.S.A.* (1992). **89**, 4220]. *Proc. natn. Acad. Sci. U.S.A.* **88**, 7376–7380.
- CYERT, M. S. AND THORNER, J. (1992). Regulatory subunit (CNB1 gene product) of yeast  $\text{Ca}^{2+}$ /calmodulin-dependent phosphoprotein phosphatases is required for adaptation to pheromone. *Molec. cell. Biol.* **12**, 3460–3469.
- DAVIS, T. N. (1994).  $\text{Ca}^{2+}$  in *Saccharomyces cerevisiae*. In *Calcium Regulation of Cellular Function* (ed. A. R. Means). New York: Raven Press.



- DUNN, T., GABLE, K. AND BEELER, T. (1994). Regulation of cellular Ca<sup>2+</sup> by yeast vacuoles. *J. biol. Chem.* **269**, 7273–7278.
- EILAM, Y. (1982a). The effect of monovalent cations on calcium efflux in yeasts. *Biochim. biophys. Acta* **687**, 8–16.
- EILAM, Y. (1982b). Studies on calcium efflux in the yeast *Saccharomyces cerevisiae*. *Microbios* **35**, 99–110.
- EILAM, Y., LAVI, H. AND GROSSOWICZ, N. (1985). Cytoplasmic Ca<sup>2+</sup> homeostasis maintained by a vacuolar Ca<sup>2+</sup> transport system in the yeast *Saccharomyces cerevisiae*. *J. gen. Microbiol.* **131**, 623–629.
- EILAM, Y. AND OTHMAN, M. (1990). Activation of Ca<sup>2+</sup> influx by metabolic substrates in *Saccharomyces cerevisiae*: role of membrane potential and cellular ATP levels. *J. gen. Microbiol.* **136**, 861–867.
- EILAM, Y., OTHMAN, M. AND HALACHMI, D. (1990). Transient increase in Ca<sup>2+</sup> influx in *Saccharomyces cerevisiae* in response to glucose: effects of intracellular acidification and cyclic AMP levels. *J. gen. Microbiol.* **136**, 2537–2543.
- FOOR, F., PARENT, S. A., MORIN, N., DAHL, A. M., RAMADAN, N., CHREBET, G., BOSTIAN, K. A. AND NIELSEN, J. B. (1992). Calcineurin mediates inhibition by FK506 and cyclosporin of recovery from alpha-factor arrest in yeast. *Nature* **360**, 682–684.
- GARCIABLAS, B., RUBIO, F., QUINTERO, F. J., BANUELOS, M. A., HARO, R. AND RODRIGUEZ-NAVARRO, A. (1993). Differential expression of two genes encoding isoforms of the ATPase involved in sodium efflux in *Saccharomyces cerevisiae*. *Molec. gen. Genet.* **236**, 363–368.
- GEISER, J. R., VAN TUINEN, D., BROCKERHOFF, S. E., NEFF, M. M. AND DAVIS, T. N. (1991). Can calmodulin function without binding calcium? *Cell* **65**, 949–959.
- GHISLAIN, M., GOFFEAU, A., HALACHMI, D. AND EILAM, Y. (1990). Calcium homeostasis and transport are affected by disruption of *cta3*, a novel gene encoding Ca<sup>2+</sup>-ATPase in *Schizosaccharomyces pombe*. *J. biol. Chem.* **265**, 18400–18407.
- GUNTESKI-HAMBLIN, A. M., CLARKE, D. M. AND SHULL, G. E. (1992). Molecular cloning and tissue distribution of alternatively spliced mRNAs encoding possible mammalian homologues of the yeast secretory pathway calcium pump. *Biochemistry, N.Y.* **31**, 7600–7608.
- GUSTIN, M. C., ZHOU, X. L., MARTINAC, B. AND KUNG, C. (1988). A mechanosensitive ion channel in the yeast plasma membrane. *Science* **242**, 762–765.
- HALACHMI, D. AND EILAM, Y. (1989). Cytosolic and vacuolar Ca<sup>2+</sup> concentrations in yeast cells measured with the Ca<sup>2+</sup>-sensitive fluorescence dye indo-1. *Febs Lett.* **256**, 55–61.
- HALACHMI, D. AND EILAM, Y. (1993). Calcium homeostasis in yeast cells exposed to high concentrations of calcium. Roles of vacuolar H<sup>+</sup>-ATPase and cellular ATP. *Febs Lett.* **316**, 73–78.
- HALACHMI, D., GHISLAIN, M. AND EILAM, Y. (1992). An intracellular ATP-dependent calcium pump within the yeast *Schizosaccharomyces pombe*, encoded by the gene *cta3*. *Eur. J. Biochem.* **207**, 1003–1008.
- HARO, R., GARCIABLAS, B. AND RODRIGUEZ-NAVARRO, A. (1991). A novel P-type ATPase from yeast involved in sodium transport. *Febs Lett.* **291**, 189–191.
- HIRAGA, K., TAHARA, H., TAGUCHI, N., TSUCHIYA, E., FUKUI, S. AND MIYAKAWA, T. (1991). Inhibition of membrane Ca<sup>2+</sup>-ATPase of *Saccharomyces cerevisiae* by mating pheromone  $\alpha$ -factor *in vitro*. *J. gen. Microbiol.* **137**, 1–4.
- HUANG, L., BERKELMAN, T., FRANKLIN, A. E. AND HOFFMAN, N. E. (1993). Characterization of a gene encoding a Ca<sup>2+</sup>-ATPase-like protein in the plastid envelope. *Proc. natn. Acad. Sci. U.S.A.* **90**, 10066–10070.
- IIDA, H., SAKAGUCHI, S., YAGAWA, Y. AND ANRAKU, Y. (1990a). Cell cycle control by Ca<sup>2+</sup> in *Saccharomyces cerevisiae*. *J. biol. Chem.* **265**, 21216–21222.
- IIDA, H., YAGAWA, Y. AND ANRAKU, Y. (1990b). Essential role for induced Ca<sup>2+</sup> influx followed by [Ca<sup>2+</sup>]<sub>i</sub> rise in maintaining viability of yeast cells late in the mating pheromone response pathway. A study of [Ca<sup>2+</sup>]<sub>i</sub> in single *Saccharomyces cerevisiae* cells with imaging of fura-2. *J. biol. Chem.* **265**, 13391–13399.
- MAGYAR, A. AND VARADI, A. (1990). Molecular cloning and chromosomal localization of a sarco/endoplasmic reticulum-type Ca<sup>2+</sup>-ATPase of *Drosophila melanogaster*. *Biochem. biophys. Res. Commun.* **173**, 872–877.
- MENDOZA, I., RUBIO, F., RODRIGUEZ-NAVARRO, A. AND PARDO, J. M. (1994). The protein phosphatase calcineurin is essential for NaCl tolerance of *Saccharomyces cerevisiae*. *J. biol. Chem.* **269**, 8792–8796.

- MURAKAMI, K., TANABE, K. AND TAKADA, S. (1990). Structure of a *Plasmodium yoelii* gene-encoded protein homologous to the  $\text{Ca}^{2+}$ -ATPase of rabbit skeletal muscle sarcoplasmic reticulum. *J. Cell Sci.* **97**, 487–495.
- NAKAJIMA, S. J., IIDA, H., TSUJI, F. I. AND ANRAKU, Y. (1991). Monitoring of intracellular calcium in *Saccharomyces cerevisiae* with an apoaequorin cDNA expression system. *Proc. natn. Acad. Sci. U.S.A.* **88**, 6878–6882.
- NAKAMURA, T., LIU, Y., HIRATA, D., NAMBA, H., HARADA, S., HIROKAWA, T. AND MIYAKAWA, T. (1993). Protein phosphatase type 2B (calcineurin)-mediated, FK506-sensitive regulation of intracellular ions in yeast is an important determinant for adaptation to high salt stress conditions. *EMBO J.* **12**, 4063–4071.
- OHSUMI, Y. AND ANRAKU, Y. (1983). Calcium transport driven by a proton motive force in vacuolar membrane vesicles of *Saccharomyces cerevisiae*. *J. biol. Chem.* **258**, 5614–5617.
- OHSUMI, Y. AND ANRAKU, Y. (1985). Specific induction of  $\text{Ca}^{2+}$  transport activity in MATa cells of *Saccharomyces cerevisiae* by a mating pheromone, alpha factor. *J. biol. Chem.* **260**, 10482–10486.
- OHSUMI, Y., KITAMOTO, K. AND ANRAKU, Y. (1988). Changes induced in the permeability barrier of the yeast plasma membrane by cupric ion. *J. Bacteriol.* **170**, 2676–2682.
- OHYA, Y., KAWASAKI, H., SUZUKI, K., LONDESBOROUGH, J. AND ANRAKU, Y. (1991). Two yeast genes encoding calmodulin-dependent protein kinases. Isolation, sequencing and bacterial expressions of CMK1 and CMK2. *J. biol. Chem.* **266**, 12784–12794.
- OHYA, Y., OHSUMI, Y. AND ANRAKU, Y. (1984). Genetic study of the role of calcium ions in the cell division cycle of *Saccharomyces cerevisiae*: a calcium-dependent mutant and its trifluoperazine-dependent pseudorevertants. *Molec. gen. Genet.* **193**, 389–394.
- OHYA, Y., OHSUMI, Y. AND ANRAKU, Y. (1986). Isolation and characterization of  $\text{Ca}^{2+}$ -sensitive mutants of *Saccharomyces cerevisiae*. *J. gen. Microbiol.* **132**, 979–988.
- OHYA, Y., UMEMOTO, N., TANIDA, I., OHTA, A., IIDA, H. AND ANRAKU, Y. (1991). Calcium-sensitive cts mutants of *Saccharomyces cerevisiae* showing a Pet- phenotype are ascribable to defects of vacuolar membrane  $\text{H}^+$ -ATPase activity. *J. biol. Chem.* **266**, 13971–13977.
- OKOROKOV, L. A., KULAKOVSKAYA, T. V., LICHKO, L. P. AND POLOROTOVA, E. V. (1985).  $\text{H}^+$ /ion antiport as the principal mechanism of transport systems in the vacuolar membrane of the yeast *Saccharomyces carlsbergensis*. *Febs Lett.* **192**, 303–306.
- OKOROKOV, L. A., TANNER, W. AND LEHLE, L. (1993). A novel primary  $\text{Ca}^{2+}$ -transport system from *Saccharomyces cerevisiae*. *Eur. J. Biochem.* **216**, 573–577.
- PARDO, J. M. AND SERRANO, R. (1989). Structure of a plasma membrane  $\text{H}^+$ -ATPase gene from the plant *Arabidopsis thaliana*. *J. biol. Chem.* **264**, 8557–8562.
- PAUSCH, M. H., KAIM, D., KUNISAWA, R., ADMON, A. AND THORNER, J. (1991). Multiple  $\text{Ca}^{2+}$ /calmodulin-dependent protein kinase genes in a unicellular eukaryote. *EMBO J.* **10**, 1511–1522.
- PRASAD, K. R. AND ROSOFF, P. M. (1992). Characterization of the energy-dependent, mating factor-activated  $\text{Ca}^{2+}$  influx in *Saccharomyces cerevisiae*. *Cell Calcium* **13**, 615–626.
- RIPMASTER, T. L., VAUGHN, G. P. AND WOOLFORD, J., JR (1993). DRS1 to DRS7, novel genes required for ribosome assembly and function in *Saccharomyces cerevisiae*. *Molec. cell. Biol.* **13**, 7901–7912.
- RUDOLPH, H. K., ANTEBI, A., FINK, G. R., BUCKLEY, C. M., DORMAN, T. E., LEVITRE, J., DAVIDOW, L. S., MAO, J. I. AND MOIR, D. T. (1989). The yeast secretory pathway is perturbed by mutations in PMR1, a member of a  $\text{Ca}^{2+}$  ATPase family. *Cell* **58**, 133–145.
- SAMBROOK, J. F. (1990). The involvement of calcium in transport of secretory proteins from the endoplasmic reticulum. *Cell* **61**, 197–199.
- SCHLESSER, A., ULASZEWSKI, S., GHISLAIN, M. AND GOFFEAU, A. (1988). A second transport ATPase gene in *Saccharomyces cerevisiae*. *J. biol. Chem.* **263**, 19480–19487.
- SERRANO, R., KIELLAND, B. M. AND FINK, G. R. (1986). Yeast plasma membrane ATPase is essential for growth and has homology with ( $\text{Na}^+$ + $\text{K}^+$ ),  $\text{K}^+$ - and  $\text{Ca}^{2+}$ -ATPases. *Nature* **319**, 689–693.
- SHULL, G. E. AND GREEB, J. (1988). Molecular cloning of two isoforms of the plasma membrane  $\text{Ca}^{2+}$ -transporting ATPase from rat brain. Structural and functional domains exhibit similarity to  $\text{Na}^+$ ,  $\text{K}^+$ - and other cation transport ATPases. *J. biol. Chem.* **263**, 8646–8657.
- URIBE, S., RANGEL, P. AND PARDO, J. P. (1992). Interactions of calcium with yeast mitochondria. *Cell Calcium* **13**, 211–217.
- WIMMERS, L. E., EWING, N. N. AND BENNETT, A. B. (1992). Higher plant  $\text{Ca}^{2+}$ -ATPase: primary structure and regulation of mRNA abundance by salt. *Proc. natn. Acad. Sci. U.S.A.* **89**, 9205–9209.
- YOUATT, J. (1993). Calcium and microorganisms. *Crit. Rev. Microbiol.* **19**, 83–97.
